# Supplementary material
Source: MDPI journal article supplement (https://www.mdpi.com/2079-6412/13/7/1182)
Supplement: s1 [file s1]

# Interaction of Aluminum and Platinum Surfaces with the Ionic Liquids 1-butyl-1-methylpyrrolidinium bis(trifluoromethylsulfonyl)imide and 1-ethyl-3-methylimidazolium bis(trifluoromethylsulfonyl)imide

Fabien Krebs, Oliver Höfft \* and Frank Endres \*

Institute of Electrochemistry, Clausthal University of Technology, Arnold-Sommerfeld-Str. 6, 38678 Clausthal-Zellerfeld, Germany; fabien.krebs@tu-clausthal.de

\* Correspondence: oliver.hoefft@tu-clausthal.de (O.H.); frank.endres@tu-clausthal.de (F.E.)

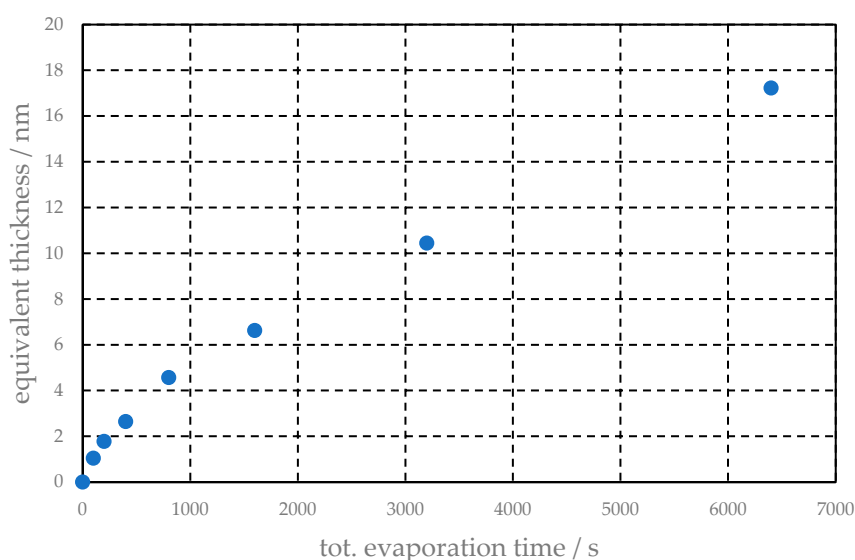

**Figure S1.** Equivalent layer thickness of [Py<sub>1,4</sub>]TFSI on Pt over total evaporation time.

**Table S1.** Fitting constraints for detail spectra: [Py<sub>1,4</sub>]TFSI on platinum.

| Component                                                                                                                                                                                                                                                                                             |                |                    |            |      |
|-------------------------------------------------------------------------------------------------------------------------------------------------------------------------------------------------------------------------------------------------------------------------------------------------------|----------------|--------------------|------------|------|
|  <p>Copyright: © 2023 by the authors. Licensee MDPI, Basel, Switzerland. This article is an open access article distributed under the terms and conditions of the Creative Commons Attribution (CC BY) license</p> | Detail spectra | BE Constraint / eV | Line shape | FWHM |
|                                                                                                                                                                                                                                                                                                       |                |                    |            |      |
|                                                                                                                                                                                                                                                                                                       |                |                    |            |      |
|                                                                                                                                                                                                                                                                                                       |                |                    |            |      |
|                                                                                                                                                                                                                                                                                                       |                |                    |            |      |

(<https://creativecommons.org/licenses/by/4.0/>).

|                            |       |               |               |           |
|----------------------------|-------|---------------|---------------|-----------|
| Pt 4f <sub>7/2</sub>       | Pt 4f | 70.72-70.79   | LA(1.2,85,70) | 1.01-1.03 |
| F(TFSI)                    | F 1s  | 688.33-688.88 | GL(30)        | 1.78-1.85 |
| S(TFSI)                    | S 2p  | 168.25-168.91 | GL(30)        | 1.15-1.25 |
| C(TFSI)                    | C 1s  | 292.20-292.87 | GL(30)        | 1.11-1.12 |
| C-C, C-R, CO <sub>ad</sub> | C 1s  | 283.94-284.04 | GL(30)        | 1.19-1.21 |
| C(alkyl)                   | C 1s  | 284.92-285.36 | GL(30)        | 1.49      |
| C(hetero)                  | C 1s  | 268.02-286.68 | GL(30)        | 1.31-1.35 |
| O(TFSI)                    | O 1s  | 532.06-532.64 | GL(30)        | 1.35-1.40 |
| N([Py <sub>1,4</sub> ])    | N 1s  | 402.00-402.54 | GL(30)        | 1.38-1.41 |
| N(TFSI)                    | N 1s  | 398.94-399.42 | GL(30)        | 1.34-1.38 |

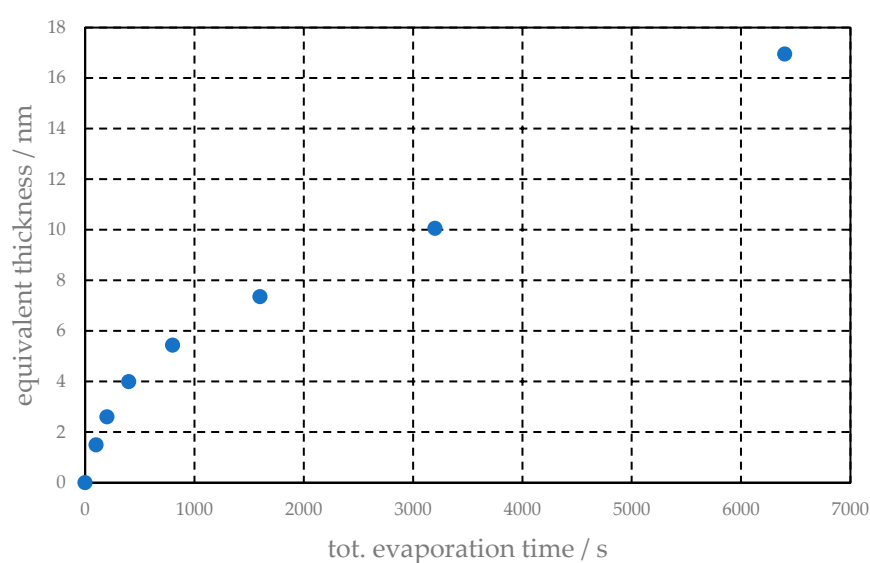

**Figure S2.** Equivalent layer thickness of [Py<sub>1,4</sub>]TFSI on Al over total evaporation time.

**Table S2.** Fitting constraints for detail spectra: [Py<sub>1,4</sub>]TFSI on aluminum.

| Component                                                   | Detail spectra | BE Constraint / eV | Line shape | FWHM      |
|-------------------------------------------------------------|----------------|--------------------|------------|-----------|
| Al 2p <sub>3/2</sub>                                        | Al 2p          | 72.60-72.90        | GL(30)     | 0.70-0.75 |
| Al <sub>x</sub> O                                           | Al 2p          | 73.80-74.20        | GL(30)     | 1.00-1.05 |
| AlOOH, Al(OH) <sub>3</sub> , Al <sub>2</sub> S <sub>3</sub> | Al 2p          | 74.45-74.60        | GL(30)     | 1.00-1.10 |
| Al <sub>2</sub> O <sub>3</sub>                              | Al 2p          | 75.10-75.15        | GL(30)     | 1.00-1.05 |
| Al <sub>2</sub> (SO <sub>4</sub> ) <sub>3</sub>             | Al 2p          | 75.90-76.10        | GL(30)     | 1.00-1.10 |
| AlF <sub>3</sub>                                            | Al 2p          | 76.50-77.00        | GL(30)     | 1.00-1.10 |
| F(TFSI)                                                     | F 1s           | 689.96-690.05      | GL(30)     | 1.78-1.99 |
| CF <sub>2</sub> , AlF <sub>3</sub>                          | F 1s           | 687.10-687.50      | GL(30)     | 1.58-1.87 |
| CF                                                          | F 1s           | 685.94-686.20      | GL(30)     | 1.58-1.86 |
| S(TFSI)                                                     | S 2p           | 169.77-170.05      | GL(30)     | 1.20-1.22 |
| NCF <sub>2</sub> SO, SO <sub>2</sub>                        | S 2p           | 171.50-171.80      | GL(30)     | 1.05-1.10 |
| sulfide                                                     | S 2p           | 162.35-162.40      | GL(30)     | 1.13-1.14 |
| C(TFSI)                                                     | C 1s           | 293.97-294.18      | GL(30)     | 1.18-1.22 |
| CF, CF <sub>2</sub> , COF <sub>2</sub>                      | C 1s           | 293.30-293.50      | GL(30)     | 1.18-1.20 |
| C-C, C-R, CO <sub>ad</sub>                                  | C 1s           | 284.60-284.90      | GL(30)     | 1.33-1.36 |
| C(alkyl)                                                    | C 1s           | 286.34-286.48      | GL(30)     | 1.37-1.39 |

|                                             |      |               |        |           |
|---------------------------------------------|------|---------------|--------|-----------|
| C(hetero)                                   | C 1s | 287.32-287.78 | GL(30) | 1.22-1.25 |
| C≡N, CFO                                    | C 1s | 288.00-288.20 | GL(30) | 1.70-1.74 |
| CSO <sub>2</sub>                            | C 1s | 285.50-285.70 | GL(30) | 1.20-1.30 |
| Miss. H, Alkyl ch.                          | C 1s | 281.60-282.40 | GL(30) | 1.20-1.30 |
| O(TFSI), Al(NSO <sub>2</sub> ) <sub>3</sub> | O 1s | 533.70-533.90 | GL(30) | 1.40-1.50 |
| Al <sub>k</sub> O                           | O 1s | 531.70-531.90 | GL(30) | 1.19-1.30 |
| C-O, COR, Al <sub>2</sub> O <sub>3</sub>    | O 1s | 532.20-532.50 | GL(30) | 1.80-1.90 |
| AlOOH, Al(OH) <sub>3</sub>                  | O 1s | 534.50-534.70 | GL(30) | 1.25-1.30 |
| N([Py <sub>1,4</sub> ])                     | N 1s | 403.50-403.80 | GL(30) | 1.20-1.25 |
| N(TFSI), Al(NSO <sub>2</sub> ) <sub>3</sub> | N 1s | 400.30-400.60 | GL(30) | 1.28-1.29 |
| Miss. CF <sub>3</sub> , O                   | N 1s | 399.05-399.20 | GL(30) | 1.00-1.10 |
| TFSI <sub>dec.</sub>                        |      |               |        |           |

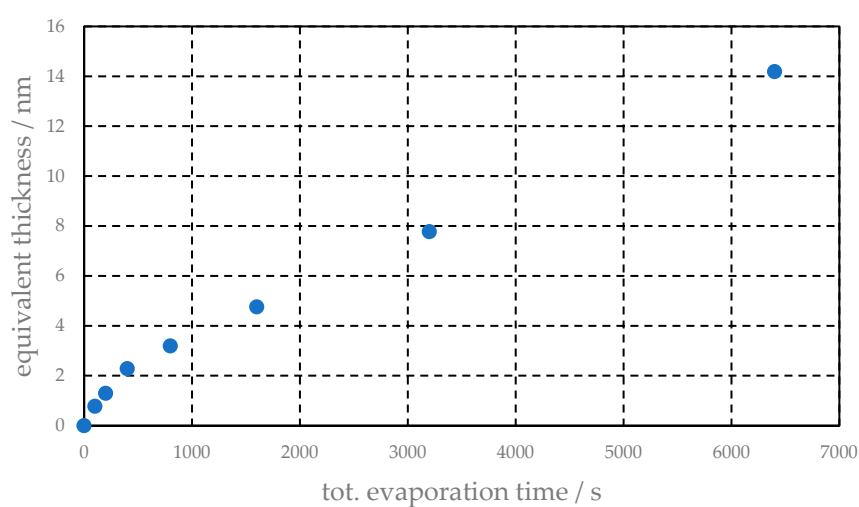

**Figure S3.** Equivalent layer thickness of [EMIm]TFSI on Pt over total evaporation time.

**Table S3.** Fitting constraints for detail spectra: [EMIm]TFSI on platinum.

| Component               | Detail spectra | BE Constraint / eV | Line shape    | FWHM      |
|-------------------------|----------------|--------------------|---------------|-----------|
| Pt 4f <sub>7/2</sub>    | Pt 4f          | 70.87-70.94        | LA(1.2,85,70) | 1.07-1.09 |
| F(TFSI)                 | F 1s           | 688.33-688.89      | GL(30)        | 1.75-1.80 |
| S(TFSI)                 | S 2p           | 168.24-168.94      | GL(30)        | 1.15-1.25 |
| C(TFSI)                 | C 1s           | 292.19-292.88      | GL(30)        | 0.95-1.27 |
| C-C, C-R                | C 1s           | 283.98             | GL(30)        | 1.12      |
| C1                      | C 1s           | 286.50-287.63      | GL(30)        | 0.95-1.27 |
| C2                      | C 1s           | 285.80-286.92      | GL(30)        | 0.95-1.27 |
| C3                      | C 1s           | 285.13-286.40      | GL(30)        | 0.95-1.27 |
| C4                      | C 1s           | 284.40-285.27      | GL(30)        | 0.95-1.27 |
| O(TFSI)                 | O 1s           | 532.06-532.67      | GL(30)        | 1.32-1.40 |
| N([Py <sub>1,4</sub> ]) | N 1s           | 401.90-402.15      | GL(30)        | 1.30-1.35 |
| N(TFSI)                 | N 1s           | 399.00-399.60      | GL(30)        | 1.38-1.40 |
| Miss. Ch., charge,...   | N 1s           | 400.30-400.50      | GL(30)        | 1.20-1.27 |

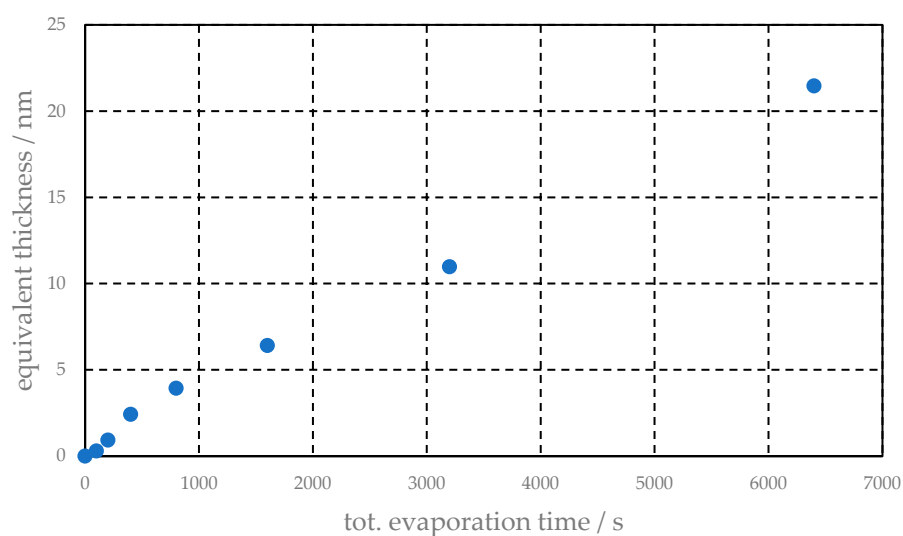

**Figure S4.** Equivalent layer thickness of [EMIm]TFSI on Al over total evaporation time.

**Table S4.** Fitting constraints for detail spectra: [EMIm]TFSI on aluminum.

| Component                                                   | Detail spectra | BE Constraint / eV | Line shape | FWHM      |
|-------------------------------------------------------------|----------------|--------------------|------------|-----------|
| Al 2p <sub>3/2</sub>                                        | Al 2p          | 72.60-72.90        | GL(30)     | 0.70-0.75 |
| Al <sub>x</sub> O                                           | Al 2p          | 73.80-74.20        | GL(30)     | 1.00-1.05 |
| AlOOH, Al(OH) <sub>3</sub> , Al <sub>2</sub> S <sub>3</sub> | Al 2p          | 74.45-74.60        | GL(30)     | 1.00-1.10 |
| Al <sub>2</sub> O <sub>3</sub>                              | Al 2p          | 75.10-75.15        | GL(30)     | 1.00-1.05 |
| Al <sub>2</sub> (SO <sub>4</sub> ) <sub>3</sub>             | Al 2p          | 75.90-76.10        | GL(30)     | 1.00-1.10 |
| AlF <sub>3</sub>                                            | Al 2p          | 76.50-77.00        | GL(30)     | 1.00-1.10 |
| F(TFSI)                                                     | F 1s           | 689.80-689.90      | GL(30)     | 1.75-1.82 |
| CF <sub>2</sub> , AlF <sub>3</sub>                          | F 1s           | 687.30-687.50      | GL(30)     | 1.20-1.70 |
| CF                                                          | F 1s           | 686.00-686.20      | GL(30)     | 1.70-1.90 |
| S(TFSI)                                                     | S 2p           | 169.90-170.10      | GL(30)     | 1.20-1.22 |
| Al(NSO <sub>2</sub> ) <sub>3</sub>                          | S 2p           | 170.85-170.90      | GL(30)     | 1.10-1.15 |
| NCF <sub>2</sub> SO, SO <sub>2</sub>                        | S 2p           | 171.75-171.80      | GL(30)     | 1.05-1.10 |
| sulfide                                                     | S 2p           | 162.35-162.40      | GL(30)     | 1.13-1.14 |
| C(TFSI)                                                     | C 1s           | 293.85-294.10      | GL(30)     | 1.18-1.22 |
|                                                             | C 1s           | 295.55             | GL(30)     | 0.88      |
| CF, CF <sub>2</sub> , COF <sub>2</sub>                      | C 1s           | 292.90-293.10      | GL(30)     | 1.15-1.20 |
| C-C, C-R, CO <sub>ad</sub>                                  | C 1s           | 284.65-284.80      | GL(30)     | 1.15-1.40 |
| C1                                                          | C 1s           | 288.30-288.80      | GL(30)     | 1.06-1.09 |
| C2                                                          | C 1s           | 287.30-288.20      | GL(30)     | 0.94-0.97 |
| C3                                                          | C 1s           | 286.20-287.50      | GL(30)     | 0.94-0.97 |
| C4                                                          | C 1s           | 286.00-286.50      | GL(30)     | 1.06-1.09 |
| C≡N, CFO                                                    | C 1s           | 288.00-288.20      | GL(30)     | 1.70-1.74 |
| CSO <sub>2</sub>                                            | C 1s           | 285.75-285.90      | GL(30)     | 1.15-1.30 |
| Miss. H, Alkyl ch.                                          | C 1s           | 281.80-281.95      | GL(30)     | 1.15-1.35 |
| Miss. H, Alkyl ch.                                          | C 1s           | 282.75-282.90      | GL(30)     | 1.15-1.25 |
| O(TFSA), Al(NSO <sub>2</sub> ) <sub>3</sub>                 | O 1s           | 533.70-533.90      | GL(30)     | 1.40-1.50 |
| Al <sub>x</sub> O                                           | O 1s           | 531.70-531.90      | GL(30)     | 1.19-1.30 |
| C-O, COR, Al <sub>2</sub> O <sub>3</sub>                    | O 1s           | 532.20-532.50      | GL(30)     | 1.45-1.55 |
| AlOOH, Al(OH) <sub>3</sub>                                  | O 1s           | 534.50-534.70      | GL(30)     | 1.25-1.30 |
| N([Py <sub>1,4</sub> ])                                     | N 1s           | 403.50-403.80      | GL(30)     | 1.20-1.25 |

---

|                                                |      |               |        |           |
|------------------------------------------------|------|---------------|--------|-----------|
| N(TFSI), Al(NSO <sub>2</sub> ) <sub>3</sub>    | N 1s | 400.30-400.60 | GL(30) | 1.28-1.29 |
| Miss. CF <sub>3</sub> , O, TFSI <sub>dec</sub> | N 1s | 399.05-399.20 | GL(30) | 1.00-1.10 |

---

**Disclaimer/Publisher's Note:** The statements, opinions and data contained in all publications are solely those of the individual author(s) and contributor(s) and not of MDPI and/or the editor(s). MDPI and/or the editor(s) disclaim responsibility for any injury to people or property resulting from any ideas, methods, instructions or products referred to in the content.
